# Supplementary figures and images for: Molecular subtyping and prognostic assessment of prostate cancer based on consensus genes
Source: Research Square preprint supplement (doi:10.21203/rs.3.rs-413181/v1), 2021-04-21

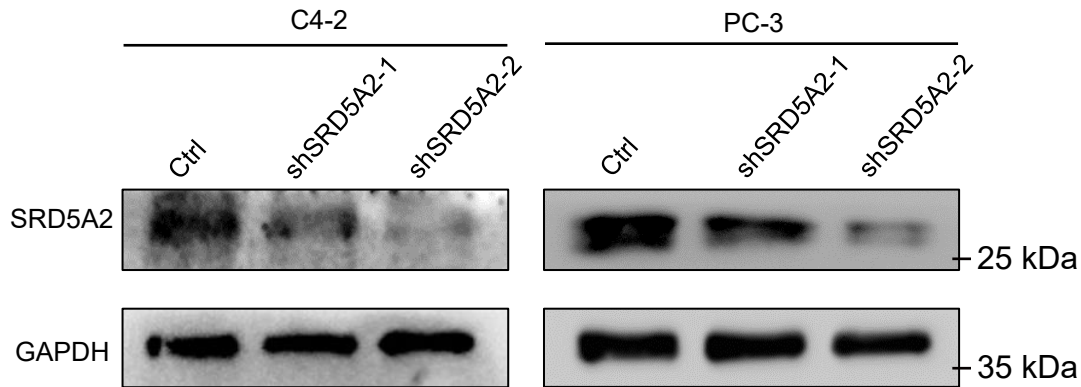

**Figure S4. Knockdown efficiencies of SRD5A2 in prostate cancer C4-2 and PC-3 cell lines.**

Supplement: Supplementary file 1 [file 39b6f2669b514ed2cbbc4676.pdf]
